# Supplementary material for: Rational Design of Lewis Base Electron Transport Materials for Improved Interface Property in Inverted Perovskite Solar Cells: A Theoretical Investigation
Source: MDPI journal article supplement (doi:10.3390/nano13091560), 2023-05-05
Supplement: s1 [file s1]

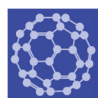

## Article

# Rational Design of Lewis Base Electron Transport Materials for Improved Interface Property in Inverted Perovskite Solar Cells: A Theoretical Investigation

Xueqin Ran <sup>1</sup>, Jixuan Yang <sup>1</sup>, Mohamad Akbar Ali <sup>2,3,\*</sup>, Lei Yang <sup>4,\*</sup> and Yonghua Chen <sup>1</sup>

<sup>1</sup> Key Laboratory of Flexible Electronics (KLOFE) & Institution of Advanced Materials (IAM), School of Flexible Electronics (Future Technologies), Nanjing Tech University (Nanjing Tech), Nanjing 211816, China; 202161122151@njtech.edu.cn (J.Y.)

<sup>2</sup> Centre for Molecular Systems and Organic Devices (CMSOD), Key Laboratory for Organic Electronics and Information Displays & Jiangsu Key Laboratory for Biosensors, Institute of Advanced Materials (IAM), Jiangsu National Synergetic Innovation Center for Advanced Materials (SICAM), Nanjing University of Posts & Telecommunications, 9 Wenyuan Road, Nanjing 210023, China

<sup>3</sup> Advanced Materials Chemistry Center (AMCC), Khalifa University of Science and Technology, Abu Dhabi P.O. Box 127788, United Arab Emirates

<sup>4</sup> Department of Chemistry, College of Art and Science, Khalifa University of Science and Technology, Abu Dhabi P.O. Box 127788, United Arab Emirates

\* Correspondence: akbar.mohamad@ku.ac.ae (M.A.A.); iamlyang@njupt.edu.cn (L.Y.); Tel.: +971-23124159 (M.A.A.); +86-025-8586-6999 (L.Y.)

**Table S1.** The name and abbreviation of investigated molecules.

| Molecular Name                                                                                                                    | Abbreviation |
|-----------------------------------------------------------------------------------------------------------------------------------|--------------|
| 2,9-diphenylanthra[2,1,9-def:6,5,10-d'e'f']diisoquinoline-1,3,8,10(2H,9H)-tetraone                                                | PDI-Ph       |
| 2-(2-(acetylsilyl)ethyl)-9-methylanthra[2,1,9-def:6,5,10-d'e'f']diisoquinoline-1,3,8,10(2H,9H)-tetraone                           | PDI-Si       |
| N-(2-(9-methyl-1,3,8,10-tetraoxo-3,8,9,10-tetrahydroanthra[2,1,9-def:6,5,10-d'e'f']diisoquinolin-2(1H)-yl)ethyl)acetamide         | PDI-N        |
| 2-(2-(acetylphosphaneyl)ethyl)-9-methylanthra[2,1,9-def:6,5,10-d'e'f']diisoquinoline-1,3,8,10(2H,9H)-tetraone                     | PDI-P        |
| 2-(9-methyl-1,3,8,10-tetraoxo-3,8,9,10-tetrahydroanthra[2,1,9-def:6,5,10-d'e'f']diisoquinolin-2(1H)-yl)ethyl acetate              | PDI-O        |
| S-(2-(9-methyl-1,3,8,10-tetraoxo-3,8,9,10-tetrahydroanthra[2,1,9-def:6,5,10-d'e'f']diisoquinolin-2(1H)-yl)ethyl) ethanethioate    | PDI-S        |
| Se-(2-(9-methyl-1,3,8,10-tetraoxo-3,8,9,10-tetrahydroanthra[2,1,9-def:6,5,10-d'e'f']diisoquinolin-2(1H)-yl)ethyl) ethaneselenoate | PDI-Se       |

**Table S2.** Optimized geometrical parameters and frequencies for studied molecules. 3-1. Geometrical parameters of PDI-Ph.

| Center Number | Atomic Number | Atomic Type | Coordinates (Angstroms) |           |          |
|---------------|---------------|-------------|-------------------------|-----------|----------|
|               |               |             | X                       | Y         | Z        |
| 1             | 6             | 0           | -5.060451               | -1.249590 | 0.000315 |

---

|    |   |   |           |           |           |
|----|---|---|-----------|-----------|-----------|
| 2  | 6 | 0 | -5.060451 | 1.249589  | 0.000475  |
| 3  | 7 | 0 | -5.712114 | 0.000000  | 0.000335  |
| 4  | 6 | 0 | -1.481160 | -2.431583 | 0.000013  |
| 5  | 6 | 0 | -0.735848 | -1.249806 | -0.000026 |
| 6  | 6 | 0 | -1.434033 | 0.000000  | 0.000062  |
| 7  | 6 | 0 | -2.865335 | 0.000000  | 0.000196  |
| 8  | 6 | 0 | -3.576710 | -1.225853 | 0.000223  |
| 9  | 6 | 0 | -2.880946 | -2.423793 | 0.000123  |
| 10 | 6 | 0 | -0.735848 | 1.249806  | 0.000017  |
| 11 | 6 | 0 | -3.576710 | 1.225853  | 0.000283  |
| 12 | 1 | 0 | -3.441087 | -3.352657 | 0.000140  |
| 13 | 6 | 0 | -2.880946 | 2.423793  | 0.000210  |
| 14 | 6 | 0 | -1.481160 | 2.431583  | 0.000089  |
| 15 | 1 | 0 | -3.441087 | 3.352657  | 0.000278  |
| 16 | 8 | 0 | -5.701258 | 2.290843  | 0.000162  |
| 17 | 8 | 0 | -5.701258 | -2.290843 | 0.000115  |
| 18 | 6 | 0 | 2.880946  | -2.423793 | -0.000354 |
| 19 | 6 | 0 | 3.576710  | -1.225853 | -0.000422 |
| 20 | 6 | 0 | 2.865335  | 0.000000  | -0.000337 |
| 21 | 6 | 0 | 1.434033  | 0.000000  | -0.000205 |
| 22 | 6 | 0 | 0.735848  | -1.249806 | -0.000163 |
| 23 | 6 | 0 | 1.481160  | -2.431583 | -0.000242 |
| 24 | 1 | 0 | 3.441087  | -3.352657 | -0.000416 |
| 25 | 6 | 0 | 3.576710  | 1.225853  | -0.000350 |
| 26 | 6 | 0 | 0.735848  | 1.249806  | -0.000106 |
| 27 | 6 | 0 | 1.481160  | 2.431583  | -0.000113 |
| 28 | 6 | 0 | 2.880946  | 2.423793  | -0.000217 |
| 29 | 1 | 0 | 3.441087  | 3.352657  | -0.000220 |

---

|    |   |   |           |           |           |
|----|---|---|-----------|-----------|-----------|
| 30 | 6 | 0 | 5.060451  | 1.249590  | -0.000483 |
| 31 | 6 | 0 | 5.060451  | -1.249589 | -0.000570 |
| 32 | 7 | 0 | 5.712114  | 0.000000  | -0.000400 |
| 33 | 8 | 0 | 5.701258  | 2.290843  | -0.000038 |
| 34 | 8 | 0 | 5.701258  | -2.290843 | -0.000161 |
| 35 | 6 | 0 | -9.245519 | 0.000159  | -1.210074 |
| 36 | 6 | 0 | -7.849487 | 0.000158  | -1.212337 |
| 37 | 6 | 0 | -7.161781 | 0.000000  | 0.000196  |
| 38 | 6 | 0 | -7.849715 | -0.000158 | 1.212600  |
| 39 | 6 | 0 | -9.245746 | -0.000159 | 1.210072  |
| 40 | 6 | 0 | -9.944657 | 0.000000  | -0.000066 |
| 41 | 1 | 0 | -9.784954 | 0.000284  | -2.152424 |
| 42 | 1 | 0 | -7.295420 | 0.000281  | -2.145637 |
| 43 | 1 | 0 | -7.295824 | -0.000281 | 2.146004  |
| 44 | 1 | 0 | -9.785358 | -0.000284 | 2.152321  |
| 45 | 6 | 0 | 7.849842  | 0.000006  | -1.212441 |
| 46 | 6 | 0 | 9.245872  | 0.000005  | -1.209767 |
| 47 | 6 | 0 | 9.944657  | 0.000000  | 0.000444  |
| 48 | 6 | 0 | 9.245393  | -0.000005 | 1.210379  |
| 49 | 6 | 0 | 7.849361  | -0.000006 | 1.212496  |
| 50 | 6 | 0 | 7.161781  | 0.000000  | -0.000109 |
| 51 | 1 | 0 | 7.296048  | 0.000009  | -2.145903 |
| 52 | 1 | 0 | 9.785583  | 0.000009  | -2.151960 |
| 53 | 1 | 0 | 9.784729  | -0.000009 | 2.152785  |
| 54 | 1 | 0 | 7.295196  | -0.000009 | 2.145737  |
| 55 | 1 | 0 | 0.982058  | -3.392593 | -0.000212 |
| 56 | 1 | 0 | -0.982058 | 3.392592  | 0.000054  |
| 57 | 1 | 0 | 0.982058  | 3.392592  | -0.000026 |

|    |   |   |            |           |           |
|----|---|---|------------|-----------|-----------|
| 58 | 1 | 0 | -0.982058  | -3.392593 | -0.000055 |
| 59 | 1 | 0 | 11.030642  | 0.000000  | 0.000660  |
| 60 | 1 | 0 | -11.030642 | 0.000000  | -0.000168 |

### 3-1. Vibrational frequencies of PDI-Ph.

15.502700 22.809800 27.788200 30.722600 31.552700 46.565900 57.594400 65.750400 71.903700  
84.161900 98.666300 126.401600 127.122100 138.117600 152.243600 179.506400 185.791300 218.089600  
233.011500 233.659200 271.885000 272.696900 289.889200 302.890000 314.187700 346.577400  
351.010000 387.416400 390.913100 420.553200 420.565000 430.656000 436.614000 437.413000  
439.941300 446.802700 458.200400 478.002600 480.357000 481.142600 505.921400 518.108600  
519.716600 530.458800 533.156100 546.992500 576.061700 601.830300 620.094700 623.915000  
629.964100 632.426300 643.242100 648.701600 649.059700 655.249600 694.059500 704.198100  
707.871700 712.241700 714.550700 721.799000 735.185900 754.713500 755.310500 762.902100  
768.893200 771.327300 776.051200 802.884800 821.740100 827.056400 843.072400 845.836700  
845.837100 853.006100 861.901600 863.827300 865.062500 865.367900 904.778100 927.308300  
940.181500 970.562400 976.381600 976.383900 987.446800 990.137800 991.403600 994.706100  
998.384400 1002.147800 1002.362200 1018.789300 1018.836800 1047.636600 1048.993800 1066.162400  
1079.868200 1101.506300 1101.509700 1150.296700 1157.848100 1165.413800 1167.343900 1168.057900  
1184.241500 1184.242300 1197.430400 1197.452600 1203.754500 1207.906000 1224.456100 1228.544600  
1249.918500 1257.169700 1268.977700 1276.107500 1317.797700 1323.653300 1334.018200 1336.509600  
1336.514100 1346.367900 1355.946600 1355.947600 1366.968700 1380.970600 1382.331500 1395.434400  
1416.362200 1433.103200 1457.084400 1477.516700 1487.768100 1487.769500 1494.513900 1510.071100  
1531.718200 1531.771400 1549.800700 1565.432300 1609.220600 1619.526900 1626.033200 1635.957500  
1636.469900 1641.868700 1641.869600 1649.408800 1649.422900 1653.699600 1724.787500 1724.811300  
1758.076600 1762.648300 3184.126500 3184.129800 3193.100600 3193.101100 3201.444600 3201.463900  
3208.569000 3208.572900 3213.447300 3213.512200 3213.521100 3213.589500 3218.662900 3218.788100  
3226.887900 3226.949300 3238.492300 3238.566000

### 3-2. Geometrical parameters of PDI-Si.

| Center<br>Number | Atomic<br>Number | Atomic<br>Type | Coordinates (Angstroms) |           |           |
|------------------|------------------|----------------|-------------------------|-----------|-----------|
|                  |                  |                | X                       | Y         | Z         |
| 1                | 6                | 0              | -3.237346               | 1.236973  | -0.872257 |
| 2                | 6                | 0              | -3.235718               | -1.246059 | -0.867757 |
| 3                | 7                | 0              | -3.877985               | -0.005140 | -0.981855 |
| 4                | 6                | 0              | 0.306844                | 2.430365  | -0.393093 |
| 5                | 6                | 0              | 1.047646                | 1.249492  | -0.297530 |
| 6                | 6                | 0              | 0.357108                | -0.001267 | -0.387652 |
| 7                | 6                | 0              | -1.061170               | -0.002570 | -0.576371 |
| 8                | 6                | 0              | -1.768225               | 1.221756  | -0.671306 |
| 9                | 6                | 0              | -1.080916               | 2.420900  | -0.577132 |
| 10               | 6                | 0              | 1.049637                | -1.250727 | -0.294396 |
| 11               | 6                | 0              | -1.766574               | -1.228157 | -0.667198 |
| 12               | 1                | 0              | -1.637165               | 3.349281  | -0.649275 |
| 13               | 6                | 0              | -1.077507               | -2.425988 | -0.569147 |
| 14               | 6                | 0              | 0.310356                | -2.432904 | -0.385723 |
| 15               | 1                | 0              | -1.632462               | -3.355405 | -0.637880 |
| 16               | 8                | 0              | -3.875445               | -2.290432 | -0.938710 |
| 17               | 8                | 0              | -3.878415               | 2.280256  | -0.947190 |
| 18               | 6                | 0              | 4.634824                | 2.425756  | 0.163459  |
| 19               | 6                | 0              | 5.325599                | 1.228122  | 0.252210  |
| 20               | 6                | 0              | 4.619339                | 0.002892  | 0.162444  |
| 21               | 6                | 0              | 3.200069                | 0.001460  | -0.018665 |
| 22               | 6                | 0              | 2.507059                | 1.250769  | -0.108330 |
| 23               | 6                | 0              | 3.246227                | 2.432756  | -0.014754 |
| 24               | 1                | 0              | 5.189459                | 3.355168  | 0.234017  |
| 25               | 6                | 0              | 5.326537                | -1.221427 | 0.252438  |

---

|    |   |   |            |           |           |
|----|---|---|------------|-----------|-----------|
| 26 | 6 | 0 | 2.509284   | -1.249387 | -0.106610 |
| 27 | 6 | 0 | 3.250370   | -2.430230 | -0.012788 |
| 28 | 6 | 0 | 4.639134   | -2.420765 | 0.164595  |
| 29 | 1 | 0 | 5.195926   | -3.348981 | 0.235238  |
| 30 | 6 | 0 | 6.796892   | -1.233345 | 0.439886  |
| 31 | 6 | 0 | 6.797546   | 1.250336  | 0.440414  |
| 32 | 7 | 0 | 7.442374   | 0.006547  | 0.521288  |
| 33 | 8 | 0 | 7.444351   | -2.271611 | 0.523023  |
| 34 | 8 | 0 | 7.427725   | 2.298879  | 0.521969  |
| 35 | 1 | 0 | 2.751043   | 3.393608  | -0.080056 |
| 36 | 1 | 0 | 0.805072   | -3.393616 | -0.315142 |
| 37 | 1 | 0 | 2.756568   | -3.391843 | -0.077419 |
| 38 | 1 | 0 | 0.800246   | 3.391975  | -0.325585 |
| 39 | 6 | 0 | 8.899737   | -0.024691 | 0.707834  |
| 40 | 6 | 0 | -5.341644  | -0.006309 | -1.199250 |
| 41 | 1 | 0 | 9.364546   | -0.564212 | -0.119982 |
| 42 | 1 | 0 | -5.563691  | 0.883052  | -1.790060 |
| 43 | 1 | 0 | 9.252824   | 1.002855  | 0.742963  |
| 44 | 1 | 0 | 9.140703   | -0.546203 | 1.636660  |
| 45 | 1 | 0 | -5.563041  | -0.899246 | -1.784868 |
| 46 | 6 | 0 | -6.130739  | -0.002711 | 0.116549  |
| 47 | 1 | 0 | -5.868258  | -0.882711 | 0.715005  |
| 48 | 1 | 0 | -5.867733  | 0.880252  | 0.710405  |
| 49 | 1 | 0 | -8.475795  | -1.206448 | -0.854113 |
| 50 | 6 | 0 | -8.854064  | 0.004911  | 1.641224  |
| 51 | 8 | 0 | -8.149318  | 0.003209  | 2.641574  |
| 52 | 6 | 0 | -10.367104 | 0.012508  | 1.743391  |
| 53 | 1 | 0 | -10.771817 | 0.895953  | 1.233659  |

|    |    |   |            |           |           |
|----|----|---|------------|-----------|-----------|
| 54 | 1  | 0 | -10.781214 | -0.865596 | 1.232020  |
| 55 | 1  | 0 | -10.678102 | 0.013326  | 2.791533  |
| 56 | 14 | 0 | -8.004593  | -0.002448 | -0.114375 |
| 57 | 1  | 0 | -8.473919  | 1.196068  | -0.864149 |

### 3-3. Vibrational frequencies of PDI-Si.

12.174200 15.401700 16.833000 27.856900 37.374800 42.484000 64.670800 70.136500 73.486400  
78.780000 88.270800 95.231100 111.990000 122.691400 126.637700 127.177900 161.455900 168.265200  
185.575200 199.890300 232.602200 236.002100 261.737800 273.338800 276.735400 316.051200  
323.396200 343.493700 349.591700 363.582600 377.280800 383.917300 393.041300 396.530500  
411.897500 427.431300 434.769800 442.560300 446.753500 457.296700 468.951800 478.334300  
482.146700 515.169000 518.229000 530.900400 543.656500 575.918800 580.967700 596.087600  
599.797900 616.482900 618.275400 624.873100 648.766600 655.242100 658.058800 687.805100  
704.370100 716.057200 724.060200 729.393100 749.315700 750.685200 756.171300 759.136100  
766.400200 769.026500 801.838700 803.045000 808.344100 832.095300 853.688900 863.487800  
864.816100 865.351700 882.412800 920.016200 943.262300 945.140700 955.338000 973.710500  
988.446500 990.225000 990.968200 995.638700 998.631400 1000.686200 1023.890700 1038.330900  
1054.243000 1079.907100 1103.731600 1129.826300 1152.774700 1155.033700 1156.193600 1177.210700  
1189.170800 1210.820300 1215.195400 1225.055000 1236.053200 1243.320500 1254.110700 1265.450900  
1287.446000 1310.575400 1314.735100 1322.598700 1331.683300 1348.144200 1364.490400 1380.175000  
1380.400400 1381.471200 1392.280900 1398.021300 1412.036700 1422.928300 1432.660800 1446.989800  
1461.881400 1462.808300 1464.882900 1470.948200 1476.227900 1482.144700 1494.456800 1499.958300  
1507.459200 1510.041800 1549.620200 1565.263800 1608.707800 1619.288800 1626.034600 1635.683000  
1636.273000 1653.081500 1709.571100 1713.412600 1733.266200 1746.888800 1752.400500 2212.077800  
2216.428200 3029.370800 3056.050500 3076.794100 3093.870500 3105.257000 3106.044600 3138.605000  
3142.965600 3161.127900 3202.549600 3212.411100 3212.612200 3218.783500 3219.228300 3226.219600  
3226.533500 3237.458900 3237.560900

### 3-4. Geometrical parameters of PDI-N.

| Center<br>Number | Atomic<br>Number | Atomic<br>Type | Coordinates (Angstroms) |           |           |
|------------------|------------------|----------------|-------------------------|-----------|-----------|
|                  |                  |                | X                       | Y         | Z         |
| 1                | 6                | 0              | -3.542377               | 1.348345  | -0.482429 |
| 2                | 6                | 0              | -3.580355               | -1.136630 | -0.551628 |
| 3                | 7                | 0              | -4.211693               | 0.120312  | -0.571616 |
| 4                | 6                | 0              | 0.041723                | 2.478618  | -0.192059 |
| 5                | 6                | 0              | 0.767409                | 1.284763  | -0.164578 |
| 6                | 6                | 0              | 0.052978                | 0.046852  | -0.245992 |
| 7                | 6                | 0              | -1.373540               | 0.070728  | -0.353639 |
| 8                | 6                | 0              | -2.065048               | 1.307492  | -0.376230 |
| 9                | 6                | 0              | -1.354103               | 2.493956  | -0.295400 |
| 10               | 6                | 0              | 0.729862                | -1.214486 | -0.222923 |
| 11               | 6                | 0              | -2.102053               | -1.141652 | -0.436390 |
| 12               | 1                | 0              | -1.898348               | 3.432016  | -0.313199 |
| 13               | 6                | 0              | -1.427192               | -2.351488 | -0.411245 |
| 14               | 6                | 0              | -0.031707               | -2.383079 | -0.305737 |
| 15               | 1                | 0              | -1.999724               | -3.270621 | -0.474262 |
| 16               | 8                | 0              | -4.235779               | -2.167639 | -0.629574 |
| 17               | 8                | 0              | -4.171940               | 2.402680  | -0.493837 |
| 18               | 6                | 0              | 4.391707                | 2.396926  | 0.136701  |
| 19               | 6                | 0              | 5.066818                | 1.187402  | 0.162120  |
| 20               | 6                | 0              | 4.337545                | -0.024711 | 0.078893  |
| 21               | 6                | 0              | 2.911237                | -0.000961 | -0.029962 |
| 22               | 6                | 0              | 2.234549                | 1.260187  | -0.053635 |
| 23               | 6                | 0              | 2.996146                | 2.428614  | 0.029852  |
| 24               | 1                | 0              | 4.963886                | 3.316076  | 0.201295  |
| 25               | 6                | 0              | 5.028871                | -1.261101 | 0.103798  |



---

|    |   |   |            |           |           |
|----|---|---|------------|-----------|-----------|
| 26 | 6 | 0 | 2.197059   | -1.238947 | -0.112139 |
| 27 | 6 | 0 | 2.923061   | -2.432446 | -0.084533 |
| 28 | 6 | 0 | 4.319043   | -2.447687 | 0.022026  |
| 29 | 1 | 0 | 4.863840   | -3.385435 | 0.042157  |
| 30 | 6 | 0 | 6.506436   | -1.299059 | 0.217492  |
| 31 | 6 | 0 | 6.546499   | 1.183463  | 0.278090  |
| 32 | 7 | 0 | 7.174694   | -0.071153 | 0.298059  |
| 33 | 8 | 0 | 7.140509   | -2.348410 | 0.242524  |
| 34 | 8 | 0 | 7.196017   | 2.220541  | 0.353518  |
| 35 | 1 | 0 | 2.513660   | 3.398015  | 0.013705  |
| 36 | 1 | 0 | 0.450854   | -3.352394 | -0.289258 |
| 37 | 1 | 0 | 2.411366   | -3.384827 | -0.146087 |
| 38 | 1 | 0 | 0.553789   | 3.430834  | -0.131503 |
| 39 | 6 | 0 | 8.638752   | -0.128558 | 0.412548  |
| 40 | 6 | 0 | -5.679656  | 0.160593  | -0.695402 |
| 41 | 1 | 0 | 9.054929   | -0.649473 | -0.452264 |
| 42 | 1 | 0 | -5.925844  | 1.015613  | -1.327319 |
| 43 | 1 | 0 | 9.009164   | 0.892344  | 0.460466  |
| 44 | 1 | 0 | 8.915674   | -0.681160 | 1.312885  |
| 45 | 1 | 0 | -5.995333  | -0.764125 | -1.176881 |
| 46 | 6 | 0 | -6.362999  | 0.305568  | 0.677795  |
| 47 | 1 | 0 | -6.265512  | -0.621255 | 1.246609  |
| 48 | 1 | 0 | -5.894159  | 1.122083  | 1.235811  |
| 49 | 7 | 0 | -7.783885  | 0.578907  | 0.535849  |
| 50 | 1 | 0 | -8.063260  | 1.506206  | 0.250490  |
| 51 | 6 | 0 | -8.759386  | -0.350117 | 0.792522  |
| 52 | 8 | 0 | -8.505213  | -1.492664 | 1.160619  |
| 53 | 6 | 0 | -10.189153 | 0.127737  | 0.597682  |

|    |   |   |            |           |           |
|----|---|---|------------|-----------|-----------|
| 54 | 1 | 0 | -10.725916 | 0.017568  | 1.544130  |
| 55 | 1 | 0 | -10.266958 | 1.165900  | 0.261613  |
| 56 | 1 | 0 | -10.677428 | -0.521828 | -0.134045 |

### 3-5. Vibrational frequencies of PDI-N.

10.886400 19.162200 22.789300 27.611900 41.951900 46.351100 60.761000 66.486900 73.394800  
82.736800 85.419500 100.843000 120.347200 124.140900 128.630000 162.823400 180.027000 194.914400  
215.174700 235.590300 266.555400 272.804600 279.041900 287.709800 314.973300 324.822200  
349.048000 364.385000 380.710700 389.174000 393.236300 396.852700 411.930400 423.484700  
434.956100 442.816300 446.552200 463.918500 467.414000 475.908200 478.268000 501.137700  
518.638500 530.426300 546.692000 576.003300 586.575500 598.300200 614.771800 618.393400  
624.722100 629.516100 645.748100 652.458100 657.329500 688.046300 706.111700 717.416400  
725.566300 731.372300 754.304900 757.359500 760.633900 764.554300 769.112000 805.518100  
807.511400 832.093800 852.824000 862.783200 864.368000 865.308000 877.896600 906.889800  
923.958000 966.299200 982.187700 988.155100 990.688000 995.520400 998.643800 998.738100  
1032.974000 1042.598300 1050.624100 1055.722800 1078.438900 1087.227000 1105.484500 1114.078200  
1152.164900 1156.563900 1171.779700 1182.373000 1204.700500 1212.354500 1218.787200 1227.611400  
1244.930700 1254.981100 1266.083000 1272.566800 1311.049100 1315.346800 1319.454800 1323.513000  
1332.148100 1347.791000 1353.408500 1369.146800 1376.221500 1383.451300 1385.144200 1395.818500  
1403.928600 1414.353200 1424.991100 1432.868000 1446.891300 1464.699100 1473.857300 1476.068700  
1481.402700 1489.282900 1492.029800 1494.756200 1499.817300 1507.166300 1510.372700 1548.565700  
1549.911300 1565.547600 1609.128700 1619.314200 1626.319600 1635.809800 1636.646300 1653.148200  
1711.531400 1713.797400 1748.462300 1752.289000 1757.930300 3054.418500 3070.560900 3076.940000  
3104.622800 3133.124500 3136.721100 3141.598100 3143.198000 3174.546700 3202.653700 3213.106400  
3213.304300 3219.027400 3219.242800 3226.755000 3226.883400 3238.074500 3238.266300 3641.598900

### 3-6. Geometrical parameters of PDI-P.

| Center | Atomic | Atomic | Coordinates (Angstroms) |
|--------|--------|--------|-------------------------|
|--------|--------|--------|-------------------------|

| Number | Number | Type | X         | Y         | Z         |
|--------|--------|------|-----------|-----------|-----------|
| 1      | 6      | 0    | -3.281409 | 1.214022  | -0.877563 |
| 2      | 6      | 0    | -3.267969 | -1.270808 | -0.879346 |
| 3      | 7      | 0    | -3.916991 | -0.030783 | -0.986909 |
| 4      | 6      | 0    | 0.257695  | 2.422777  | -0.403266 |
| 5      | 6      | 0    | 1.003621  | 1.245042  | -0.308074 |
| 6      | 6      | 0    | 0.318772  | -0.008750 | -0.399808 |
| 7      | 6      | 0    | -1.099556 | -0.016348 | -0.588388 |
| 8      | 6      | 0    | -1.812116 | 1.205071  | -0.681270 |
| 9      | 6      | 0    | -1.129998 | 2.407245  | -0.586598 |
| 10     | 6      | 0    | 1.017073  | -1.255146 | -0.307754 |
| 11     | 6      | 0    | -1.799004 | -1.245212 | -0.680605 |
| 12     | 1      | 0    | -1.690263 | 3.333299  | -0.657498 |
| 13     | 6      | 0    | -1.104350 | -2.440035 | -0.584537 |
| 14     | 6      | 0    | 0.283443  | -2.440677 | -0.401124 |
| 15     | 1      | 0    | -1.655046 | -3.371906 | -0.654333 |
| 16     | 8      | 0    | -3.902829 | -2.316873 | -0.953270 |
| 17     | 8      | 0    | -3.928921 | 2.254005  | -0.947122 |
| 18     | 6      | 0    | 4.584564  | 2.437170  | 0.160649  |
| 19     | 6      | 0    | 5.280573  | 1.242597  | 0.249214  |
| 20     | 6      | 0    | 4.580183  | 0.014263  | 0.156226  |
| 21     | 6      | 0    | 3.161319  | 0.006540  | -0.027682 |
| 22     | 6      | 0    | 2.462776  | 1.252742  | -0.116966 |
| 23     | 6      | 0    | 3.196286  | 2.437991  | -0.020368 |
| 24     | 1      | 0    | 5.134793  | 3.368999  | 0.233730  |
| 25     | 6      | 0    | 5.292862  | -1.206880 | 0.246008  |
| 26     | 6      | 0    | 2.476493  | -1.247337 | -0.118442 |

---

|    |   |   |            |           |           |
|----|---|---|------------|-----------|-----------|
| 27 | 6 | 0 | 3.222853   | -2.424868 | -0.025084 |
| 28 | 6 | 0 | 4.611262   | -2.409253 | 0.154944  |
| 29 | 1 | 0 | 5.172152   | -3.335012 | 0.225346  |
| 30 | 6 | 0 | 6.762891   | -1.212245 | 0.436899  |
| 31 | 6 | 0 | 6.752094   | 1.271324  | 0.440911  |
| 32 | 7 | 0 | 7.402458   | 0.030511  | 0.521555  |
| 33 | 8 | 0 | 7.414825   | -2.247610 | 0.520201  |
| 34 | 8 | 0 | 7.376992   | 2.322746  | 0.525485  |
| 35 | 1 | 0 | 2.696835   | 3.396663  | -0.085163 |
| 36 | 1 | 0 | 0.782564   | -3.399159 | -0.331682 |
| 37 | 1 | 0 | 2.733677   | -3.388687 | -0.091955 |
| 38 | 1 | 0 | 0.746883   | 3.386496  | -0.335363 |
| 39 | 6 | 0 | 8.859517   | 0.005718  | 0.711751  |
| 40 | 6 | 0 | -5.378377  | -0.036623 | -1.201813 |
| 41 | 1 | 0 | 9.328782   | -0.531078 | -0.115303 |
| 42 | 1 | 0 | -5.606835  | 0.841312  | -1.807359 |
| 43 | 1 | 0 | 9.207890   | 1.034809  | 0.748552  |
| 44 | 1 | 0 | 9.100484   | -0.515394 | 1.640803  |
| 45 | 1 | 0 | -5.612709  | -0.941564 | -1.762832 |
| 46 | 6 | 0 | -6.147661  | -0.005683 | 0.124319  |
| 47 | 1 | 0 | -5.908786  | -0.891246 | 0.720983  |
| 48 | 1 | 0 | -5.875346  | 0.880315  | 0.703832  |
| 49 | 1 | 0 | -8.261544  | 1.308531  | -0.391110 |
| 50 | 6 | 0 | -8.573953  | -0.075962 | 1.643137  |
| 51 | 8 | 0 | -7.922940  | -0.637356 | 2.505089  |
| 52 | 6 | 0 | -9.914682  | 0.571664  | 1.935117  |
| 53 | 1 | 0 | -9.781019  | 1.658785  | 1.994412  |
| 54 | 1 | 0 | -10.636789 | 0.372023  | 1.136479  |

|    |    |   |            |           |           |
|----|----|---|------------|-----------|-----------|
| 55 | 1  | 0 | -10.298120 | 0.208184  | 2.891464  |
| 56 | 15 | 0 | -7.997606  | -0.069522 | -0.154101 |

### 3-7. Vibrational frequencies of PDI-P.

14.008700 14.927200 27.508500 30.874300 38.056100 52.523800 66.878200 72.343300 76.394400  
85.750100 89.285800 97.534400 102.157400 123.136600 127.196400 136.464700 162.669300 174.137900  
190.515500 207.502500 236.338700 240.234700 269.062900 273.451400 299.783700 315.926800  
324.136600 350.041000 364.113300 379.161200 385.403500 393.059800 396.633200 410.397700  
411.916700 434.866800 442.581200 446.916400 457.443700 468.147600 478.324100 481.595600  
507.707500 517.957500 531.082500 543.697300 575.880400 581.328600 597.962300 603.428400  
618.295500 618.403800 624.939800 648.651000 658.062900 684.065700 689.986900 705.950100  
716.289600 724.215400 730.244600 750.798800 755.183400 758.912000 763.229800 766.527100  
775.384200 796.001900 806.825900 831.049400 834.313900 853.742000 863.559300 864.846700  
865.465900 891.290300 921.023700 949.596500 964.310200 976.944800 988.605400 991.028400  
995.750400 998.712400 1019.491800 1027.522000 1035.649600 1046.762300 1057.962600 1080.210200  
1104.492800 1134.010400 1144.371800 1152.800500 1156.342800 1177.294200 1189.315400 1210.964900  
1215.253000 1226.017300 1243.707700 1253.995200 1255.208400 1266.076000 1287.956800 1310.806600  
1314.979200 1322.572800 1331.880800 1348.027600 1365.411700 1380.421800 1381.234900 1385.653400  
1391.500400 1393.759400 1412.239600 1422.866100 1432.628300 1447.156300 1465.032000 1465.300000  
1472.472100 1477.399200 1478.007800 1482.108000 1494.457500 1499.924800 1507.455000 1510.052200  
1549.680500 1565.295500 1608.691100 1619.289900 1626.107900 1635.682000 1636.274500 1653.126300  
1711.116300 1713.568300 1747.704000 1752.525800 1755.245500 2387.993700 3040.540200 3076.072700  
3076.869300 3107.934500 3109.501800 3132.571300 3143.086900 3147.720000 3166.084800 3202.621700  
3212.551800 3212.692000 3218.955800 3219.241700 3226.378500 3226.553800 3237.573800 3237.724300

### 3-8. Geometrical parameters of PDI-O.

| Center | Atomic | Atomic | Coordinates (Angstroms) |   |   |
|--------|--------|--------|-------------------------|---|---|
| Number | Number | Type   | X                       | Y | Z |

---

|    |   |   |           |           |           |
|----|---|---|-----------|-----------|-----------|
| 1  | 6 | 0 | -3.567420 | 1.241208  | -0.653463 |
| 2  | 6 | 0 | -3.566217 | -1.246972 | -0.649907 |
| 3  | 7 | 0 | -4.213846 | -0.003292 | -0.734084 |
| 4  | 6 | 0 | -0.008992 | 2.431390  | -0.303586 |
| 5  | 6 | 0 | 0.734003  | 1.249959  | -0.234283 |
| 6  | 6 | 0 | 0.040197  | -0.000600 | -0.300581 |
| 7  | 6 | 0 | -1.384016 | -0.001512 | -0.438628 |
| 8  | 6 | 0 | -2.093082 | 1.223530  | -0.507270 |
| 9  | 6 | 0 | -1.402162 | 2.422574  | -0.437666 |
| 10 | 6 | 0 | 0.735540  | -1.250242 | -0.232434 |
| 11 | 6 | 0 | -2.091860 | -1.227425 | -0.504180 |
| 12 | 1 | 0 | -1.960052 | 3.351330  | -0.489374 |
| 13 | 6 | 0 | -1.399609 | -2.425539 | -0.431735 |
| 14 | 6 | 0 | -0.006351 | -2.432575 | -0.298417 |
| 15 | 1 | 0 | -1.956533 | -3.355024 | -0.480739 |
| 16 | 8 | 0 | -4.209751 | -2.289144 | -0.700278 |
| 17 | 8 | 0 | -4.211936 | 2.282617  | -0.707076 |
| 18 | 6 | 0 | 4.334878  | 2.425229  | 0.106110  |
| 19 | 6 | 0 | 5.027741  | 1.227374  | 0.171262  |
| 20 | 6 | 0 | 4.318613  | 0.002398  | 0.104136  |
| 21 | 6 | 0 | 2.894228  | 0.001352  | -0.029614 |
| 22 | 6 | 0 | 2.198969  | 1.250775  | -0.095111 |
| 23 | 6 | 0 | 2.941038  | 2.432557  | -0.025764 |
| 24 | 1 | 0 | 4.891736  | 3.354484  | 0.158808  |
| 25 | 6 | 0 | 5.028211  | -1.222045 | 0.169673  |
| 26 | 6 | 0 | 2.200719  | -1.249231 | -0.095011 |
| 27 | 6 | 0 | 2.944248  | -2.430265 | -0.027241 |

---

|    |   |   |            |           |           |
|----|---|---|------------|-----------|-----------|
| 28 | 6 | 0 | 4.338248   | -2.421228 | 0.103642  |
| 29 | 1 | 0 | 4.896886   | -3.349593 | 0.154946  |
| 30 | 6 | 0 | 6.504200   | -1.234316 | 0.309021  |
| 31 | 6 | 0 | 6.505329   | 1.249134  | 0.311482  |
| 32 | 7 | 0 | 7.152251   | 0.005287  | 0.370493  |
| 33 | 8 | 0 | 7.153255   | -2.272924 | 0.370119  |
| 34 | 8 | 0 | 7.137491   | 2.297648  | 0.373313  |
| 35 | 1 | 0 | 2.444286   | 3.393620  | -0.073659 |
| 36 | 1 | 0 | 0.490536   | -3.393282 | -0.246221 |
| 37 | 1 | 0 | 2.448503   | -3.391818 | -0.075854 |
| 38 | 1 | 0 | 0.486927   | 3.392718  | -0.253642 |
| 39 | 6 | 0 | 8.615012   | -0.026239 | 0.509845  |
| 40 | 6 | 0 | -5.674182  | -0.004141 | -0.923317 |
| 41 | 1 | 0 | 9.052505   | -0.566824 | -0.331995 |
| 42 | 1 | 0 | -5.934188  | 0.888456  | -1.491982 |
| 43 | 1 | 0 | 8.969310   | 1.001222  | 0.532445  |
| 44 | 1 | 0 | 8.885676   | -0.546736 | 1.431023  |
| 45 | 1 | 0 | -5.933659  | -0.899570 | -1.487736 |
| 46 | 6 | 0 | -6.400345  | -0.001096 | 0.419381  |
| 47 | 1 | 0 | -6.158027  | -0.890277 | 1.007472  |
| 48 | 1 | 0 | -6.158056  | 0.890749  | 1.003420  |
| 49 | 6 | 0 | -8.658147  | 0.001893  | 1.164673  |
| 50 | 8 | 0 | -8.281652  | 0.005200  | 2.318118  |
| 51 | 6 | 0 | -10.095666 | 0.001921  | 0.708244  |
| 52 | 1 | 0 | -10.293337 | 0.885839  | 0.094168  |
| 53 | 1 | 0 | -10.292439 | -0.878360 | 0.088798  |
| 54 | 1 | 0 | -10.751389 | -0.000673 | 1.578537  |
| 55 | 8 | 0 | -7.809441  | -0.001825 | 0.107199  |

---

### 3-9. Vibrational frequencies of PDI-O.

14.885300 15.978800 25.449600 28.800600 39.966700 46.333500 65.835600 70.418000 74.184800  
82.580000 86.643300 106.987300 123.266400 127.575000 150.661800 163.393500 178.120900 183.735300  
194.111200 224.751300 237.099900 265.249300 273.001500 278.589500 315.627700 324.690700  
351.276300 364.459600 381.736400 386.663600 393.087300 396.479300 411.756200 417.596400  
435.053600 442.742700 447.109600 464.335900 475.006000 478.078400 497.176500 518.073200  
531.012700 546.747000 576.095800 587.403500 598.599800 602.901400 618.487700 624.972500  
631.722100 643.587500 650.657400 657.633600 688.424900 706.207800 717.367700 725.899200  
731.676900 754.451800 758.087600 764.567000 765.348000 774.193300 806.785100 812.401500  
831.748700 853.390700 863.228000 864.785100 865.356700 890.599100 902.463800 929.372500  
963.812200 986.261200 987.524400 988.527900 990.935100 995.763000 998.683200 1038.562100  
1048.522900 1065.468700 1070.001900 1077.988600 1086.106500 1092.146900 1106.834700 1152.369000  
1156.756500 1172.714000 1183.219300 1207.224000 1212.862500 1220.296400 1228.466200 1245.831700  
1255.148400 1267.887200 1269.348800 1295.470600 1311.667800 1315.785200 1323.254200 1332.526100  
1347.308900 1354.998700 1369.955700 1370.532500 1384.044500 1384.546500 1397.912400 1404.414200  
1415.676400 1432.786500 1436.112800 1447.828200 1465.639000 1475.338700 1477.273300 1481.666400  
1482.359900 1494.708900 1500.007500 1507.362600 1510.375200 1516.886200 1549.894100 1565.524100  
1609.014100 1619.366900 1626.377400 1635.888300 1636.520600 1653.297300 1714.011400 1714.628700  
1749.417000 1754.097800 1802.052900 3062.753400 3077.146600 3078.089700 3116.658000 3128.627400  
3132.438900 3143.507600 3175.802700 3177.938300 3202.879500 3213.288500 3213.513500 3219.053600  
3219.487200 3226.804800 3227.102000 3238.321700 3238.409900



## 3-10. Geometrical parameters of PDI-S.

| Center<br>Number | Atomic<br>Number | Atomic<br>Type | Coordinates (Angstroms) |           |           |
|------------------|------------------|----------------|-------------------------|-----------|-----------|
|                  |                  |                | X                       | Y         | Z         |
| 1                | 6                | 0              | 3.251085                | -1.536120 | -0.543580 |
| 2                | 6                | 0              | 3.352811                | 0.941920  | -0.727677 |
| 3                | 7                | 0              | 3.950668                | -0.330806 | -0.698585 |
| 4                | 6                | 0              | -0.355293               | -2.554568 | -0.139486 |
| 5                | 6                | 0              | -1.048551               | -1.341360 | -0.151798 |
| 6                | 6                | 0              | -0.303627               | -0.128107 | -0.302391 |
| 7                | 6                | 0              | 1.119328                | -0.195398 | -0.435253 |
| 8                | 6                | 0              | 1.777306                | -1.450309 | -0.414617 |
| 9                | 6                | 0              | 1.037376                | -2.612381 | -0.267643 |
| 10               | 6                | 0              | -0.946664               | 1.150883  | -0.324119 |
| 11               | 6                | 0              | 1.877598                | 0.991979  | -0.586727 |
| 12               | 1                | 0              | 1.556634                | -3.564578 | -0.253091 |
| 13               | 6                | 0              | 1.235057                | 2.219430  | -0.605536 |
| 14               | 6                | 0              | -0.156748               | 2.293476  | -0.475791 |
| 15               | 1                | 0              | 1.829894                | 3.119000  | -0.721564 |
| 16               | 8                | 0              | 4.032786                | 1.950924  | -0.866360 |
| 17               | 8                | 0              | 3.852843                | -2.605073 | -0.517070 |
| 18               | 6                | 0              | -4.693919               | -2.340302 | 0.267913  |
| 19               | 6                | 0              | -5.336500               | -1.112986 | 0.251183  |
| 20               | 6                | 0              | -4.577427               | 0.074034  | 0.099940  |
| 21               | 6                | 0              | -3.154769               | 0.006769  | -0.034805 |
| 22               | 6                | 0              | -2.511978               | -1.272139 | -0.014452 |
| 23               | 6                | 0              | -3.302078               | -2.414571 | 0.136645  |

---

|    |   |   |           |           |           |
|----|---|---|-----------|-----------|-----------|
| 24 | 1 | 0 | -5.288543 | -3.239849 | 0.384665  |
| 25 | 6 | 0 | -5.235219 | 1.328774  | 0.082984  |
| 26 | 6 | 0 | -2.410066 | 1.220044  | -0.186019 |
| 27 | 6 | 0 | -3.103530 | 2.433036  | -0.196852 |
| 28 | 6 | 0 | -4.496145 | 2.490914  | -0.064514 |
| 29 | 1 | 0 | -5.015581 | 3.443095  | -0.075369 |
| 30 | 6 | 0 | -6.708744 | 1.411745  | 0.221958  |
| 31 | 6 | 0 | -6.812940 | -1.063805 | 0.393664  |
| 32 | 7 | 0 | -7.407392 | 0.207172  | 0.368864  |
| 33 | 8 | 0 | -7.314464 | 2.478015  | 0.211998  |
| 34 | 8 | 0 | -7.488120 | -2.078402 | 0.527014  |
| 35 | 1 | 0 | -2.845498 | -3.396394 | 0.156167  |
| 36 | 1 | 0 | -0.613566 | 3.275139  | -0.496120 |
| 37 | 1 | 0 | -2.568085 | 3.367516  | -0.309511 |
| 38 | 1 | 0 | -0.890993 | -3.488910 | -0.027200 |
| 39 | 6 | 0 | -8.867065 | 0.309414  | 0.505953  |
| 40 | 6 | 0 | 5.417542  | -0.412558 | -0.842206 |
| 41 | 1 | 0 | -9.284521 | 0.806561  | -0.372109 |
| 42 | 1 | 0 | 5.635035  | -1.288765 | -1.453913 |
| 43 | 1 | 0 | -9.264018 | -0.698078 | 0.601699  |
| 44 | 1 | 0 | -9.112938 | 0.905129  | 1.387654  |
| 45 | 1 | 0 | 5.740970  | 0.491136  | -1.356464 |
| 46 | 6 | 0 | 6.104805  | -0.526045 | 0.525396  |
| 47 | 1 | 0 | 5.949601  | 0.377159  | 1.122447  |
| 48 | 1 | 0 | 5.738375  | -1.399694 | 1.067807  |
| 49 | 6 | 0 | 8.505480  | 0.862864  | 0.981797  |
| 50 | 8 | 0 | 7.772525  | 1.714009  | 1.436759  |
| 51 | 6 | 0 | 10.008005 | 1.023146  | 0.883446  |

|    |    |   |           |           |          |
|----|----|---|-----------|-----------|----------|
| 52 | 1  | 0 | 10.517184 | 0.083987  | 0.655869 |
| 53 | 1  | 0 | 10.225026 | 1.746418  | 0.089838 |
| 54 | 1  | 0 | 10.380727 | 1.433757  | 1.825719 |
| 55 | 16 | 0 | 7.917002  | −0.723103 | 0.344895 |

### 3-11. Vibrational frequencies of PDI-S.

11.594400 16.988000 22.212800 25.354300 38.290400 44.206900 58.733600 64.340300 72.707900  
79.308100 83.892900 94.629500 118.076000 122.019200 127.938400 161.662300 176.589200 188.886100  
200.072800 229.107600 238.891800 247.104100 268.757500 272.497300 314.261000 323.067300  
331.520800 362.028800 365.166200 380.930700 383.621500 393.243100 397.324900 412.002300  
434.385300 442.465300 446.209400 458.509000 468.143000 477.940100 481.661700 492.827900  
517.806700 530.217100 532.522500 544.035500 575.166800 582.743900 598.130500 611.843500  
618.233800 623.927000 624.397600 648.365500 657.317500 686.954000 704.902000 716.295800  
724.269900 729.855700 747.523200 753.081000 757.844700 758.643600 765.922000 770.913800  
803.433400 806.625100 832.046300 852.975900 862.850900 865.128400 865.715200 885.893700  
921.043800 956.377500 976.837200 980.744600 988.225000 990.641300 995.638700 998.669500  
1017.011400 1027.247200 1029.996000 1045.470100 1057.713600 1080.170200 1104.234500 1127.104100  
1138.252200 1152.391200 1156.484000 1177.111000 1189.162900 1210.587500 1215.762100 1225.888500  
1243.852400 1253.921000 1266.892500 1281.355400 1294.676800 1310.183100 1314.568100 1322.018100  
1331.091300 1347.394400 1364.363200 1377.892200 1380.082700 1385.966400 1390.880600 1393.400800  
1409.307600 1418.767300 1432.386400 1446.743100 1464.882100 1470.842500 1472.494500 1476.073800  
1481.152400 1481.551900 1494.702800 1499.845600 1507.195000 1509.872900 1549.926400 1565.505900  
1608.927900 1619.124400 1626.287200 1635.349700 1636.748000 1652.661500 1713.360900 1713.677800  
1749.212400 1753.710600 1776.166800 3054.070200 3076.719600 3081.530100 3114.348800 3128.891000  
3142.907400 3147.373400 3152.080900 3180.184600 3202.484900 3211.996800 3212.126200 3219.078500  
3219.310200 3226.212600 3226.411100 3237.373900 3237.457400

## 3-12. Geometrical parameters of PDI-Se.

| Center<br>Number | Atomic<br>Number | Atomic<br>Type | Coordinates (Angstroms) |           |           |
|------------------|------------------|----------------|-------------------------|-----------|-----------|
|                  |                  |                | X                       | Y         | Z         |
| 1                | 6                | 0              | 2.764259                | -1.446584 | -0.678237 |
| 2                | 6                | 0              | 2.822429                | 1.026003  | -0.931075 |
| 3                | 7                | 0              | 3.442204                | -0.235976 | -0.872181 |
| 4                | 6                | 0              | -0.808538               | -2.508120 | -0.124681 |
| 5                | 6                | 0              | -1.523517               | -1.308441 | -0.169097 |
| 6                | 6                | 0              | -0.803591               | -0.088385 | -0.374686 |
| 7                | 6                | 0              | 0.615494                | -0.137551 | -0.548085 |
| 8                | 6                | 0              | 1.294216                | -1.380528 | -0.508773 |
| 9                | 6                | 0              | 0.580258                | -2.548136 | -0.294043 |
| 10               | 6                | 0              | -1.467188               | 1.179615  | -0.408746 |
| 11               | 6                | 0              | 1.349682                | 1.055847  | -0.758292 |
| 12               | 1                | 0              | 1.116926                | -3.490167 | -0.261193 |
| 13               | 6                | 0              | 0.686564                | 2.271873  | -0.795559 |
| 14               | 6                | 0              | -0.701525               | 2.328644  | -0.622905 |
| 15               | 1                | 0              | 1.262662                | 3.176572  | -0.957054 |
| 16               | 8                | 0              | 3.478957                | 2.042699  | -1.117815 |
| 17               | 8                | 0              | 3.380865                | -2.507483 | -0.651934 |
| 18               | 6                | 0              | -5.148698               | -2.360724 | 0.288765  |
| 19               | 6                | 0              | -5.807883               | -1.142137 | 0.290524  |
| 20               | 6                | 0              | -5.068515               | 0.055662  | 0.127310  |
| 21               | 6                | 0              | -3.648156               | 0.008179  | -0.036151 |
| 22               | 6                | 0              | -2.986344               | -1.260965 | -0.019400 |
| 23               | 6                | 0              | -3.758366               | -2.415352 | 0.134013  |

---

|    |   |   |           |           |           |
|----|---|---|-----------|-----------|-----------|
| 24 | 1 | 0 | -5.729163 | -3.268850 | 0.410247  |
| 25 | 6 | 0 | -5.743661 | 1.301246  | 0.125412  |
| 26 | 6 | 0 | -2.925237 | 1.230596  | -0.216724 |
| 27 | 6 | 0 | -3.634867 | 2.434193  | -0.209167 |
| 28 | 6 | 0 | -5.024035 | 2.473368  | -0.038761 |
| 29 | 1 | 0 | -5.556292 | 3.418507  | -0.035179 |
| 30 | 6 | 0 | -7.214438 | 1.363757  | 0.298999  |
| 31 | 6 | 0 | -7.280810 | -1.113357 | 0.467391  |
| 32 | 7 | 0 | -7.892980 | 0.149405  | 0.459117  |
| 33 | 8 | 0 | -7.834875 | 2.421603  | 0.305740  |
| 34 | 8 | 0 | -7.938949 | -2.137349 | 0.613987  |
| 35 | 1 | 0 | -3.288211 | -3.390936 | 0.137228  |
| 36 | 1 | 0 | -1.174915 | 3.301947  | -0.659845 |
| 37 | 1 | 0 | -3.115003 | 3.375582  | -0.336640 |
| 38 | 1 | 0 | -1.324318 | -3.445567 | 0.042110  |
| 39 | 6 | 0 | -9.350365 | 0.230941  | 0.629720  |
| 40 | 6 | 0 | 4.913568  | -0.298509 | -1.001189 |
| 41 | 1 | 0 | -9.794807 | 0.723246  | -0.237784 |
| 42 | 1 | 0 | 5.150725  | -1.093554 | -1.710857 |
| 43 | 1 | 0 | -9.730737 | -0.782215 | 0.732796  |
| 44 | 1 | 0 | -9.584414 | 0.821956  | 1.517772  |
| 45 | 1 | 0 | 5.235904  | 0.660643  | -1.401993 |
| 46 | 6 | 0 | 5.556447  | -0.574200 | 0.357943  |
| 47 | 1 | 0 | 5.320825  | 0.218531  | 1.074213  |
| 48 | 1 | 0 | 5.229090  | -1.535443 | 0.753959  |
| 49 | 6 | 0 | 7.826174  | 1.099158  | 1.167149  |
| 50 | 8 | 0 | 6.931594  | 1.771994  | 1.622824  |
| 51 | 6 | 0 | 9.283161  | 1.500525  | 1.185528  |

|    |    |   |          |           |          |
|----|----|---|----------|-----------|----------|
| 52 | 1  | 0 | 9.464840 | 2.176817  | 2.024125 |
| 53 | 1  | 0 | 9.941420 | 0.629807  | 1.246946 |
| 54 | 1  | 0 | 9.505994 | 2.028947  | 0.251253 |
| 55 | 34 | 0 | 7.508972 | −0.632684 | 0.296936 |

### 3-13. Vibrational frequencies of PDI-Se.

13.879600 17.835700 25.294200 30.772300 41.659500 55.792500 63.277600 70.025300 75.100400  
79.032900 86.393400 95.854100 113.540800 123.771000 129.239200 160.904300 168.092400 186.674300  
202.835600 216.169800 236.830000 237.181800 270.255100 273.577000 307.037600 315.584700  
322.173100 338.070900 360.123100 371.891300 379.239600 386.039700 393.279900 398.636700  
412.013700 434.058100 442.107200 444.911800 447.121300 466.332900 477.767300 479.633800  
506.268700 517.717800 527.620100 541.327400 575.203200 576.861600 580.889700 596.719900  
607.115900 618.493300 623.962600 646.607500 658.252000 681.474200 701.849200 707.614600  
718.255600 725.468500 734.039800 739.183900 757.710800 759.505400 763.988800 769.045300  
801.868700 806.500700 831.922800 852.957200 862.700700 865.313800 865.775300 884.574500  
920.290700 951.318200 962.444500 975.389400 987.235000 990.373800 995.445900 998.314300  
1014.968100 1020.283800 1029.649300 1051.714500 1057.508700 1080.146100 1104.132300 1120.458600  
1137.241700 1152.622400 1156.318300 1177.312400 1189.600200 1210.713800 1215.677500 1225.329600  
1243.329900 1254.372400 1266.997600 1271.618100 1302.604100 1310.086400 1314.700200 1322.488300  
1331.150400 1347.715600 1361.146200 1373.770400 1380.219900 1384.363300 1389.873800 1391.250000  
1408.740100 1418.605800 1432.695500 1446.858600 1463.890000 1465.421100 1470.154100 1478.532700  
1478.802700 1483.478500 1494.775700 1499.817800 1507.283800 1510.114800 1549.896800 1565.555400  
1609.147200 1619.258800 1626.353100 1635.656900 1636.843900 1653.018400 1712.726500 1713.467600  
1748.966900 1753.496900 1788.626900 3049.268900 3076.631300 3083.665900 3105.977100 3122.962200  
3142.770000 3153.404700 3159.244500 3182.875300 3202.450800 3212.051300 3212.612300 3219.116600  
3219.334600 3226.220600 3226.641800 3237.242000 3237.610400

**Table S3.** The highest occupied molecular orbital (HOMO) and lowest unoccupied molecular orbital (LUMO) energies of PDI-Ph calculated by different methods together with 6-31+G(d,p) basis set.

| Methods and Basis Sets | HOMO  | exp <sup>a</sup> | LUMO  | exp <sup>a</sup> |
|------------------------|-------|------------------|-------|------------------|
| B3LYP                  | -6.28 | -5.98            | -3.80 | -3.92            |
| PBE1PBE                | -6.46 |                  | -3.70 |                  |
| MPW1B95                | -6.30 |                  | -3.16 |                  |
| PBE33                  | -6.50 |                  | -3.20 |                  |
| PBE38                  | -6.64 |                  | -3.10 |                  |
| MPWB1K                 | -6.74 |                  | -2.84 |                  |

<sup>a</sup> ref 28.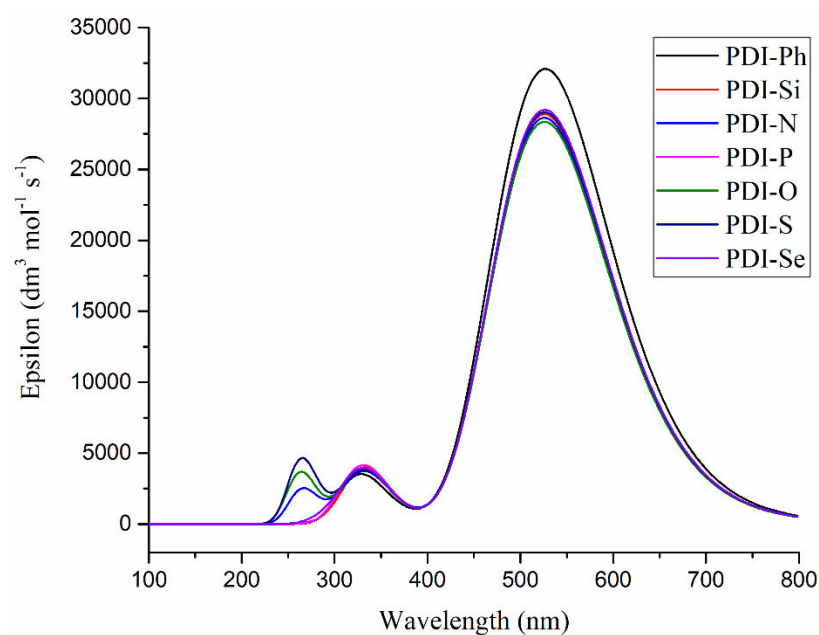**Figure S1.** TD-DFT UV-visible absorption spectrum for investigated molecules.**Table S4.** Absorption maximum wavelength ( $\lambda_{\max}$ ), oscillator strength, excitation energy, electronic transition and main configuration for the PDI derivatives.

| Molecules | $\lambda_{\max}$ | $\lambda_{\max}$ ,<br>exp <sup>a</sup> | Oscillator<br>Strength | Excitation<br>Energy | Electronic<br>Transition | Main Configu-<br>ration |
|-----------|------------------|----------------------------------------|------------------------|----------------------|--------------------------|-------------------------|
| PDI-Ph    | 527.02           | 550                                    | 0.79                   | 2.35                 | $S_0 \rightarrow S_1$    | H $\rightarrow$ L 0.71  |
| PDI-Si    | 525.95           |                                        | 0.71                   | 2.36                 | $S_0 \rightarrow S_1$    | H $\rightarrow$ L 0.71  |
| PDI-N     | 525.90           |                                        | 0.71                   | 2.36                 | $S_0 \rightarrow S_1$    | H $\rightarrow$ L 0.71  |
| PDI-P     | 526.15           |                                        | 0.72                   | 2.36                 | $S_0 \rightarrow S_1$    | H $\rightarrow$ L 0.71  |
| PDI-O     | 525.84           |                                        | 0.70                   | 2.36                 | $S_0 \rightarrow S_1$    | H $\rightarrow$ L 0.71  |
| PDI-S     | 526.08           |                                        | 0.72                   | 2.36                 | $S_0 \rightarrow S_1$    | H $\rightarrow$ L 0.71  |
| PDI-Se    | 526.36           |                                        | 0.72                   | 2.36                 | $S_0 \rightarrow S_1$    | H $\rightarrow$ L 0.71  |

<sup>a</sup> ref 28.

**Table S5.** The hole reorganization energy  $\lambda_{\text{hole}}$  (eV), centroid to centroid distance ( $d$ , Å), hole transfer integral  $V_{\text{hole}}$  (eV), hole transfer rate  $k_{\text{hole}}$  (s<sup>-1</sup>) and hole mobility  $\mu_{\text{hole}}$  (cm<sup>2</sup>V<sup>-1</sup>s<sup>-1</sup>) for studied molecules.

| Molecule | $\lambda_{\text{hole}}$ | $d$  | $V_{\text{hole}}$     | $K_{\text{hole}}$     | $\mu_{\text{hole}}$   |
|----------|-------------------------|------|-----------------------|-----------------------|-----------------------|
| PDI-Ph   | 0.16                    | 3.86 | $5.72 \times 10^{-2}$ | $2.90 \times 10^{13}$ | 0.84                  |
| PDI-Si   | 0.11                    | 4.56 | 0.22                  | $8.40 \times 10^{14}$ | 33.78                 |
| PDI-N    | 0.18                    | 4.38 | 0.34                  | $7.94 \times 10^{14}$ | 29.46                 |
| PDI-P    | 0.11                    | 5.20 | $3.18 \times 10^{-3}$ | $1.76 \times 10^{11}$ | $9.20 \times 10^{-3}$ |
| PDI-O    | 0.17                    | 4.41 | 0.46                  | $1.65 \times 10^{15}$ | 62.06                 |
| PDI-S    | 0.16                    | 5.83 | $6.75 \times 10^{-2}$ | $4.03 \times 10^{13}$ | 2.65                  |
| PDI-Se   | 0.13                    | 4.33 | 0.27                  | $9.58 \times 10^{14}$ | 34.74                 |

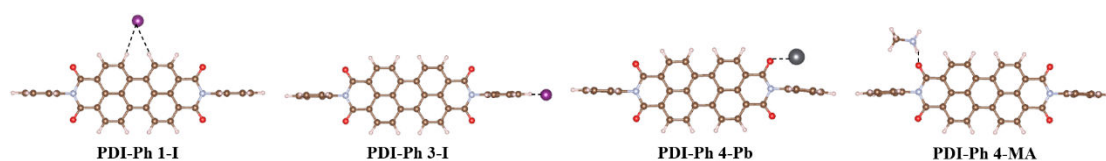**Figure S2.** Interactions between H or O in PDI-Ph with I<sup>-</sup>, Pb<sup>2+</sup> or MA<sup>+</sup>.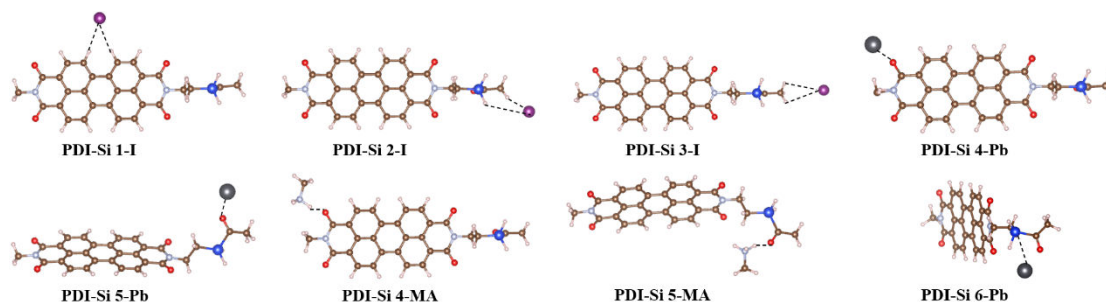**Figure S3.** Interactions between H, O or Si in PDI-Si with I<sup>-</sup>, Pb<sup>2+</sup> or MA<sup>+</sup>.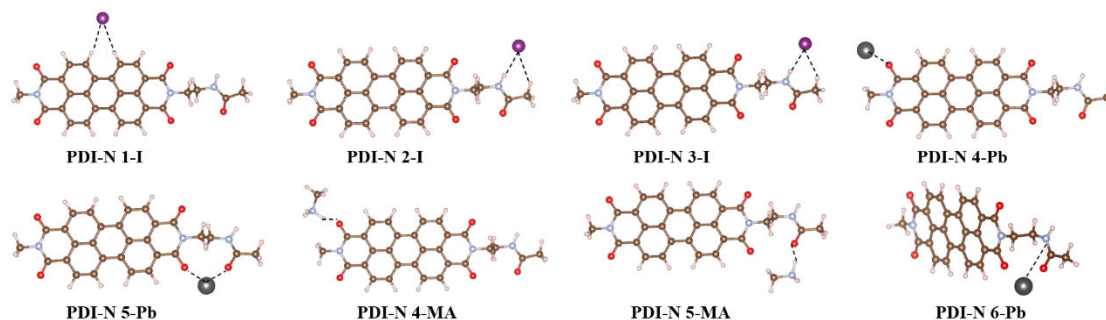**Figure S4.** Interactions between H, O or N in PDI-N with I<sup>-</sup>, Pb<sup>2+</sup> or MA<sup>+</sup>.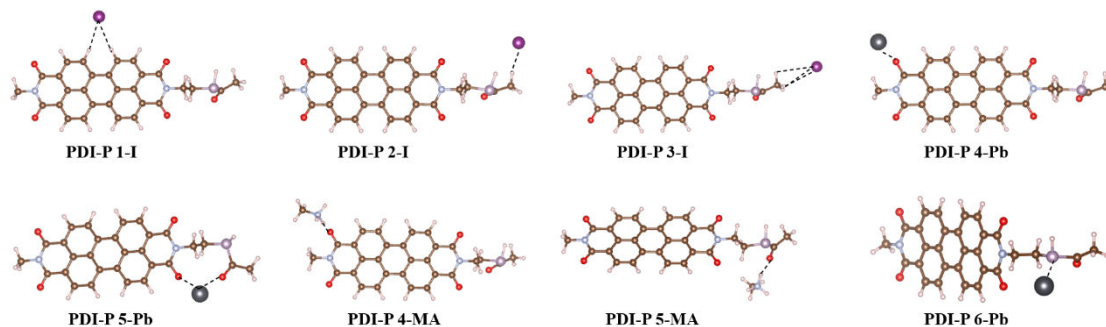**Figure S5.** Interactions between H, O or P in PDI-P with I<sup>-</sup>, Pb<sup>2+</sup> or MA<sup>+</sup>.



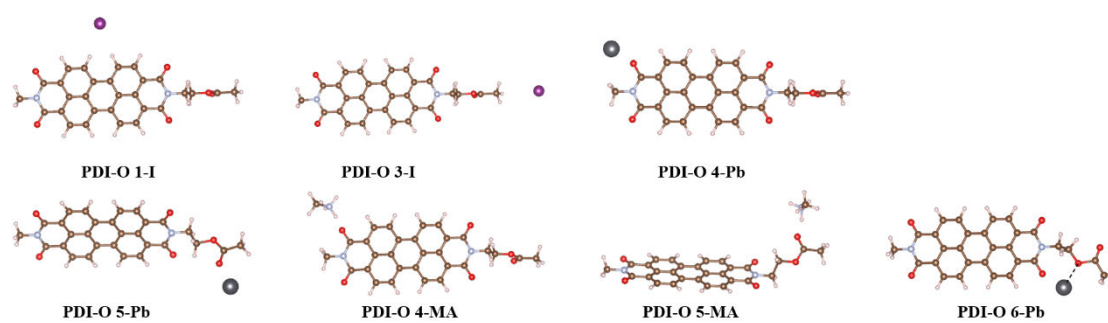

**Figure S6.** Interactions between H or O in PDI-O with I, Pb<sup>2+</sup> or MA<sup>+</sup>.

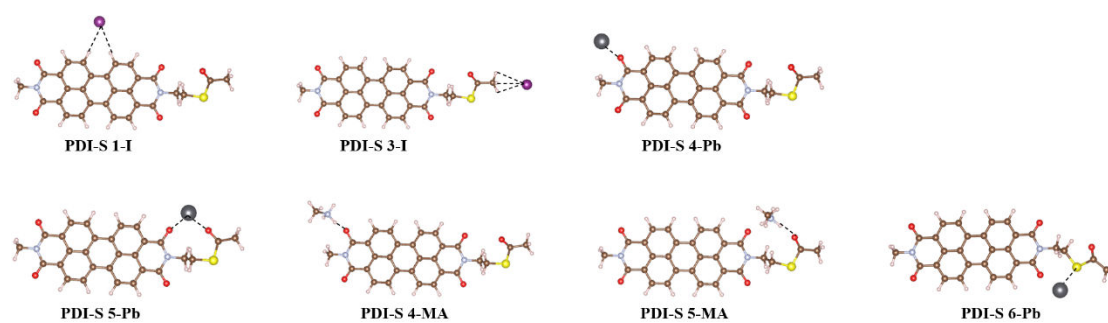

**Figure S7.** Interactions between H, O or S in PDI-S with I, Pb<sup>2+</sup> or MA<sup>+</sup>.

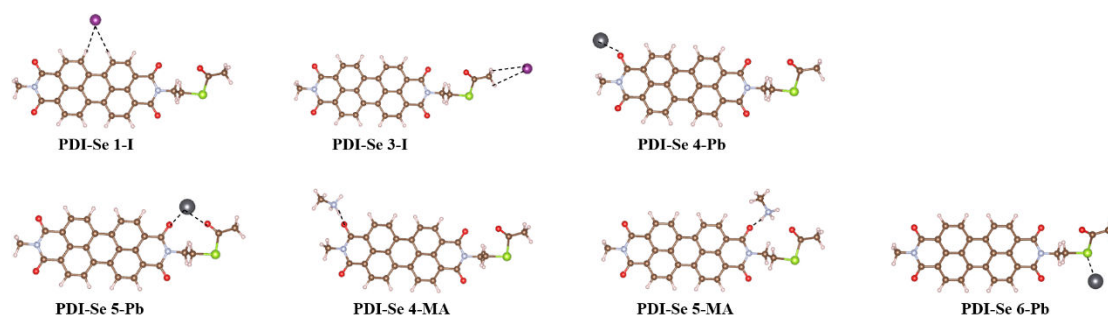

**Figure S8.** Interactions between H, O or Se in PDI-Se with I, Pb<sup>2+</sup> or MA<sup>+</sup>.
